# Supplementary material
Source: publisher site journal article supplement (https://www.dovepress.com/article/303827)
Supplement: Supplementary file 1 [file get_supplementary_file.php]

**Supplemental File**

Table S1: Summary of Secondary Outcomes of Interest

| **Study** | **Pain Score at Rest** | **Patient Satisfaction** | **Hospital LOS** | **Gait Distance** | **Range of Motion** | **Complications** |
| --- | --- | --- | --- | --- | --- | --- |
| **Kampitak 2020** | ↑ in iPACK1 vs TNB and iPACK2 on POD1 | No difference | ↓ in iPACK2 vs TNB | – | No difference | No difference in nausea/vomiting |
| **Kertkiatkachorn 2020** | No difference in POD0 and POD1 | – | – | – | No difference in POD0 and POD1 | No difference in nausea, vomiting, dizziness, and sleep disturbance |
| **Kim 2019** | ↓ in POD0 and POD1 | ↑ in PACU and POD1 | No difference | No difference | – | No difference in nerve injury |
| **Li 2020** | ↓ in POD0, no difference in POD1 | – | No difference | No difference in POD1 | No difference in POD1 | No difference in nausea, vomiting, wound swelling, wound drainage, wound delayed healing, falls after surgery, calf numbness, DVT below knee, DVT above knee, pulmonary embolism, infection, neurovascular events, three month readmission |
| **Ochroch 2020** | ↓ in POD1 | No difference in POD1 | – | No difference in POD0 and POD1 | – | No complications noted in study |
| **Patterson 2020** | ↓ in PACU, no difference in POD1 | – | No difference | No difference in POD1 | – | No difference in nausea, vomiting, pruritus, and sedation |
| **Tak 2020** | ↑ in POD0 and POD1 when compared to cACB group but not ACB group | – | – | – | – | – |
| **Vichainarong 2020** | No difference in PACU and POD1 | – | ↓ | – | ↓ ROM extension in POD1, ↓ ROM flexion in POD0 | No difference in nausea, vomiting, dizziness, and sleep disturbance |

**Supplemental Table S1.** Comparisons for secondary outcomes of measures are reported between iPACK and control arms up to 24 hours postoperatively. For certain outcomes, studies presented them at POD2, although these are not displayed in the table. ↑ refers to significantly higher scores in the iPACK cohort vs control cohort. ↓ refers to significantly lower scores in the iPACK cohort vs control cohort. “–“ = not reported, PACU = post-operative care unit, POD = post-operative day, cACB = continuous adductor canal block, ACB = single-shot adductor canal block, iPACK1 = proximal iPACK block, iPACK2 = distal iPACK block, TNB = tibial nerve block.

**Supplemental Material (Search Strategy)**

The **PubMed** search strategy will employ the following terms (yielded **1,158 hits on 10-11-20**):

(“Arthroplasty, replacement, knee”[Mesh] OR “total knee arthroplasty”[tiab] OR “knee arthroplasty”[tiab] OR “knee joint”[Mesh] OR “knee surgery”[tiab] OR “joint capsule”[Mesh]) AND (“IPACK”[tiab] OR “Nerve block”[Mesh] OR “Popliteal artery”[Mesh] OR “Anesthetics, local”[Mesh]) AND (“Pain, postoperative”[Mesh] OR “postoperative pain”[tiab] OR “Recovery of function”[Mesh] OR “analgesics, opioid”[Mesh] OR “pain measurement”[Mesh] OR “patient satisfaction”[Mesh] OR “treatment outcome”[Mesh] OR “opioid consumption”[tiab] OR “pain score”[tiab])

The **Scopus** search strategy will employ the following terms (yielded **1,176 hits on 10-11-20**):
(“total knee arthroplasty” or “knee surgery” or “knee joint” or “posterior capsule”)

AND (“IPACK” or “nerve block” or “popliteal artery” or “local anesthetic”)

AND (“pain score” or “patient satisfaction” or “pain measurement” or “opioid consumption” or “postoperative pain”)

The **Web of Science** search strategy will employ the following terms (yielded **665 hits on 10-11-20**):

(TS=(“total knee arthroplasty” or “knee surgery” or “knee joint” or “posterior capsule”))

AND (TS=(“IPACK” or “nerve block” or “popliteal artery” or “local anesthetic”))

AND (TS=(“pain score” or “patient satisfaction” or “pain measurement” or “opioid consumption” or “postoperative pain”))

The **Cochrane** search strategy will employ the following terms (yielded **35 hits on 10-11-20**):

(total knee arthroplasty:ti,ab,kw or knee surgery:ti,ab,kw or knee joint:ti,ab,kw or posterior capsule:ti,ab,kw)

AND (IPACK:ti,ab,kw or nerve block:ti,ab,kw or popliteal artery:ti,ab,kw or local anesthetic:ti,ab,kw)

AND (pain score:ti,ab,kw or patient satisfaction:ti,ab,kw or pain measurement:ti,ab,kw or opioid consumption:ti,ab,kw or postoperative pain:ti,ab,kw)
